# Supplementary material
Source: MDPI journal article supplement (https://www.mdpi.com/2504-477X/6/6/177)
Supplement: s1 [file s1]

Archive with 1 entries (1 files):
- jcs-1765414-supplementary.pdf
