# Supplementary material
Source: MDPI journal article supplement (https://www.mdpi.com/2504-477X/6/6/177)
Supplement: s1 [file s1 › jcs-1765414-supplementary.pdf]

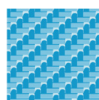

Supplementary Information

# Influence of High Energy Ball Milling and Dispersant on Capacitive Properties of Fe<sub>2</sub>O<sub>3</sub>–Carbon Nanotube Composites

Chengwei Zhang and Igor Zhitomirsky \*

**Citation:** Zhang, C.; Zhitomirsky, I. Influence of High Energy Ball Milling and Dispersant on Capacitive Properties of Fe<sub>2</sub>O<sub>3</sub>–Carbon Nanotube Composites. *J. Compos. Sci.* **2022**, *6*, 177. <https://doi.org/10.3390/jcs6060177>

Academic Editors: Yanqiu Zhu, Oluwafunmilola Ola and Nannan Wang

Received: 25 May 2022

Accepted: 15 June 2022

Published: 17 June 2022

**Publisher's Note:** MDPI stays neutral with regard to jurisdictional claims in published maps and institutional affiliations.

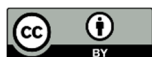

**Copyright:** © 2022 by the authors. Licensee MDPI, Basel, Switzerland. This article is an open access article distributed under the terms and conditions of the Creative Commons Attribution (CC BY) license (<https://creativecommons.org/licenses/by/4.0/>).

Department of Materials Science and Engineering, McMaster University, Hamilton, ON L8S4L7, Canada; zhanc14@mcmaster.ca

\* Correspondence: zhitom@mcmaster.ca

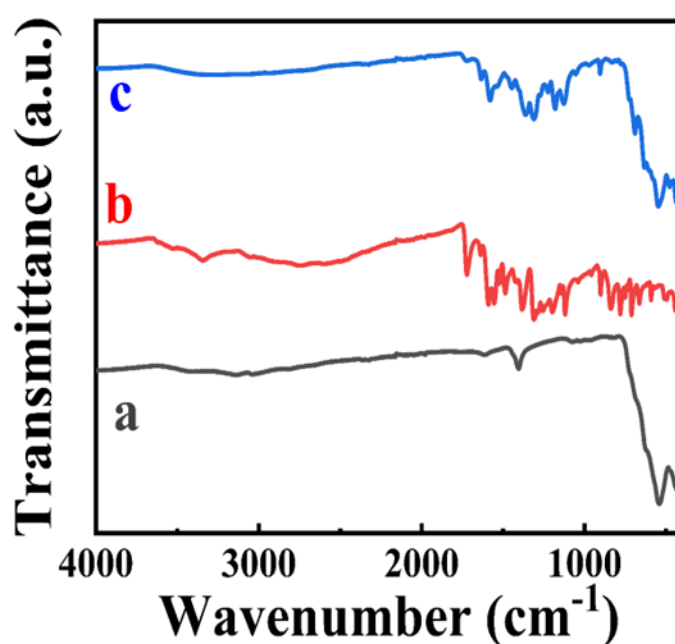

**Figure S1.** FTIR spectra of (a) as-received Fe<sub>2</sub>O<sub>3</sub>, (b) galloctanine, (c) Fe<sub>2</sub>O<sub>3</sub>, containing adsorbed galloctanine.
